# Supplementary material for: An entorhinal-visual cortical circuit regulates depression-like behaviors
Source: Springer Nature journal article supplement (doi:10.1038/s41380-022-01540-8), 2022-04-06
Supplement: MOESM1 [file 41380_2022_1540_MOESM1_ESM.docx]

**Supplementary Information for “An entorhinal-visual cortical circuit regulates depression-like behaviors”: supplementary methods and figures.**

**Supplementary Methods**

1. ***Apparatus for behavioral tests***

*SIT Box*

An open arena (length, width, height, 46 cm) with an interaction zone (length 26 cm, width 15 cm) in the middle of one side and two corner zones (length, width 10 cm) in the opposite side was used (red and blue rectangles in Fig. 3c). A perforated enclosure (length 10 cm, width 7 cm, height 46 cm) was placed in the interaction zone next to the wall.

*EPM*

The elevated-plus maze contained two opposite open arms (length 35 cm, width 10 cm) and two closed arms (length 35 cm, width 10 cm) with walls at height 20 cm (Fig. 3e). The arms were connected by an opening center (length 10 cm, width 10 cm).

*TCST Box*

The apparatus was a rectangular box (length 60 cm, width 40 cm, height 20 cm) with three chambers (length 20 cm, width 40 cm) divided by two clapboards (Fig. 4e). There was a square door in the middle bottom of the clapboard to enable mice freely move from one chamber to the adjacent chamber. The chamber in the middle was as a corridor (C). The chamber on one side was a social interaction chamber (S) with a young stranger mouse restricted in a perforated columniform cage. Another chamber was as empty chamber (E) with an empty perforated columniform cage.

1. ***Viral vector***

We used the following virus. AAV2/1-CAG-EGFP-UNC (2.9E+13v.g./ml, Genomeditech, Shanghai), AAV2/9-CAG-FLEX-GFP (6.0E+12v.g./ml, OBiO, Shanghai), AAV2-retro-hSyn-cre (2.0E+13v.g./ml, Vigene, Shandong), AAV2-retro-hSyn-GFP (3.67E+13v.g./ml, Vigene) and AAV2-retro-hSyn-tdTomato-WPRE-pA (1.31E+13v.g./ml, Taitool, Shanghai) were used for anterograde and retrograde tracing of the Ent Va neurons and the projections. AAV2/9-Syn-jGCaMP7b-WPRE (9.96E+12v.g./ml, OBiO, Shanghai) was used for fiber photometry experiment. AAV2/9-EF1a-DIO-hM4Di-mCherry (3.0E+13v.g./ml, Vigene) and AAV2/9-EF1a-DIO-mCherry (2.8E+13v.g./ml, Vigene) were used for chemogenetic experiments. AAV2/9-CaMKIIa-hChR2(H134R)-EYFP (1.4E+13v.g./ml, OBiO), AAV2/9-CaMKII-ArchT-GFP (2.1E+13v.g./ml, Addgene, USA) and AAV2/9-CaMKIIa-MCS-EYFP-3FLAG (1.7E+13v.g./ml, Addgene) were used for optogenetic manipulation.

1. ***Viral injection sites and strategies***

For brain-wide tracing of axonal projections of Ent Va neurons, Etv1-CreERT2 mice were unilaterally injected with virus targeting Ent Va (distances from bregma: AP: -4.50 mm, ML: ±4.00 mm, DV: -1.80 mm). One week after viral injection, mice were i.p. administrated with tamoxifen (100 mg/kg body weight per day) for consecutive five days (Supplementary Fig.1a, b). For Ent Va retrograde tracing experiments, virus was unilaterally injected into V2M (AP: -3.30 mm, ML: +1.50 mm, DV: -0.20 mm), PFC (AP: +2.00 mm, ML: +0.25 mm, DV: -1.40 mm), NAc (AP: +1.50 mm, ML: +1.00 mm, DV: -4.00 mm), BLA (AP: -1.20 mm, ML: +3.20 mm, DV: -4.20 mm), or HPC (AP: -2.50 mm, ML: +1.50 mm, DV: -1.80 mm) of mice. For chemogenetic experiments, AAV2-retro-hSyn-cre was bilaterally injected into V2M and AAV2/9-EF1a-DIO-hM4Di-mCherry (or AAV2/9-EF1a-DIO-mCherry) was bilaterally injected into Ent layer V.

1. ***Surgeries and Fiber photometry***

For restraint test with fiber photometry recording, mice were implanted a head-bar for head fixation as before[1]. The scalp of the mouse was removed to expose the skull covering the dorsal cortex. After clearing the exposed cranium, a thin layer of cyanoacrylate adhesive (Krazy glue, Elmer’s Products Inc) was directly applied to the intact skull. A custom titanium bar was glued to the skull (approximately over the cerebellum). Dental acrylic (Lang Dental Jet Repair Acrylic; Part# 1223-pink) was applied to cement the head bar in place.

For optogenetic manipulations, optical cannulae (NA 0.50, 200 μm, length 0.5mm, inper Inc, Hangzhou) were implanted into the superficial layer I of V2M (AP: -3.30 mm, ML: +1.50 mm, DV: -0.05 mm) bilaterally and then fixed onto the skull using dental acrylic. A thin layer of black acrylic colour (Marie’s, A-4500, Shanghai) was further applied to cover the dental acrylic to block light from entering or leaking out of the brain.

For fiber photometry setup[2], briefly, a 470 nm LED light beam (Cree XPE LED) was reflected by a dichroic mirror (MD498, Thorlabs), focused by a 10x objective lens (NA 0.3, Olympus), and then coupled to an optical fiber patch cable (230 μm, NA 0.50, length 5 m) (inper, Hangzhou) to excite GCaMP molecules in axon terminals. The emission fluorescence was bandpass filtered (MF525-39, Thorlabs) and collected by a photomultiplier tube (R3896, Hammatsu Photonics). Then the signal was further low-pass filtered (40 Hz cut-off, THINKERTECH) and digitalized at 100 Hz.

To record Ca2+ activity during reward licking, the apparatus for reward delivery was slightly modified frombefore[1, 3, 4]. The reward employed in the test was 15% milk (mass/volume percentage). Reward-licking was detected by a capacity based electric circuit and the digital signal was simultaneously recorded with Ca2+ signal in different channels. Before the test, mice were food and water deprived for 12 h to motivate them to lick in a series of bouts. If the interval between two licks was larger than 5 s, the delivery of reward stopped for a few minutes before the delivery of reward resumed. Each mouse typically had 6-8 bouts of lickings.

To record Ca2+ activity during restraint test, mice with a head-bar and optical fiber were fixed on the apparatus described before[1, 5]. The motion of animal was videotaped by a camera from the top and the Ca2+ activity was recorded simultaneously by fiber photometry. The restraint test contained two periods, with the first period under normal light condition lasting for 6-8 min and the second period under red light condition lasting for 6-8 min. The resistance of each mouse during the test was quantified by monitoring tail shaking.

1. ***Functional test of ChR2 and hM4Di***

To test whether light illumination of Ent axons in V2M could efficiently activate ChR2, we injected a bolus of Ca2+ fluorescence dye (30~50nl, OGB-1, AM) into V2M and used fiber photometry to monitor local neural activity change during laser stimulation of projections of Ent Va neurons. To test the effect of inactivation using hM4Di, a bolus of OGB-1 (30~50 nl) was injected near Ent layer Va of hM4Di mice and an optic fiber was implanted there to record local neural activity change under anesthesia. CNO at 5mg/kg body weight was i.p. administrated about 30 min before the recording.

1. ***Fiber photometry with LED flashes***

To artificially stimulate the eyes of mice, a blue LED was placed in front of the opposite eye (~20 cm distance) to the recording side of visual cortex. Ten consecutive LED pulses were delivered, with 200 ms on and 5 s off for each pulse, and the pulses were repeated 4-5 times.

1. ***Electrophysiology***

To confirm the inhibition effect of ArchT, we used silicon probes to record extracellular spiking activity from the primary somatosensory cortex in head-fixed mice with AAV2/9-CaMKII-ArchT-GFP virus injected at AP: 1.0 mm; ML: 1.80 mm; DV: 0.25 mm. The procedure of electrophysiological recording is similar as before[4, 5]. Extracellular spikes were recorded using 64-channel silicon electrodes (4 shank probes with 250 µm shank spacing and 12.5 μm site spacing, P-series, Cambridge NeuroTech). The voltage signals were acquired by the OpenEphys acquisition system (each channel sampled at 25 kHz, http://www.open-ephys.org). During each trial of recording, 594 nm laser was delivered to the recording site at one randomly chosen laser power (0, 2, 5, 10 mW; duration: 2 s, constant light profile) (Supplementary Fig. 8a, b). Spikes were sorted offline in JRCLUST[6].

1. ***Immunostaining and imaging of c-Fos***

For immunostaining, all brain samples were permeabilized in PBST (2% TritonX-100) with 20% DMSO and 0.3 mol/L glycine for 12 h, followed with blocking in PBST with 6% donkey serum and 10% DMSO for 12 h. Then, samples were incubated in the primary antibody of c-Fos (1:500, abcam, ab190289, diluted with PTwH containing PBS, 0.2% Tween-20 and 1% heparin) for 3 days with mild shaking. After that, all samples were washed using PTwH for 4-5 times during ~12 h period, followed by incubation of the secondary antibody (Alexa Fluor® 555, abcam, ab150078, 1:500 dilution with PTwH) for 3 days. All the above steps were performed under 37℃.

For light-sheet fluorescence imaging, each sagittal section was imaged at 5 μm thickness at a magnification of 8X using a macroscope (Olympus). The c-Fos-conjugated Alexa Fluor molecules was excited by 561 nm laser light and the emitted fluorescence was filtered with a dual band pass filter (590 nm, chroma). A 488 nm laser was used to visualize brain structure by imaging autofluorescence.

1. ***Data analysis***

Morphological data analysis was conducted in ImageJ (1.8.0) and MATLAB 2018a (MathWorks). In anterograde tracing experiment, the density of neural projections in different layers of the neocortex was measured as gray values from caudal to rostral direction (Supplementary Fig. 2). The projection density of brain slices covering V2M (medial-lateral 1.3-2.0 mm, the average gray values of 6 sections from caudal to rostral direction of each slice) was quantified and the density of axon terminals in bilateral V2M (the first 2 sections covered most V2M) was compared (Fig. 2p, q). In retrograde tracing experiment, V2M and other cortical and subcortical areas (PFC, NAc, BLA and HPC) projecting Ent Va neurons were counted from consecutive slices in bilateral hemispheres or ipsilateral hemisphere (Supplementary Fig. 3, Supplementary Fig. 4, Fig. 2r). The total retrograde-labeled neurons between the ipsilateral and contralateral Ent were compared (Fig. 2s).

To quantify the intensity of axonal projections of Ent Va neurons in different brain regions, we sectioned sagittal brain slices using a vibratome (VT1200 S, Leica). Each slice was sectioned at 50 μm thickness and we kept every other slice (44-45 slices was kept in total as signals in the contralateral hemisphere was weak). Slices were then registered to the corresponding sections of Allen Mouse Brain Atlas based on the SHARP-Track Framework[7]. Pixels with gray values larger than the background (calculated based on average gray value in region without axonal projections) were selected. The measured intensity was normalized to total intensity at the injection site near Ent layer Va.

To compare c-Fos expression in Ent Va neurons of susceptible and control mice in 21-day CSDS paradigm, we chose 10 brain sections (one section in every four sections with section interval ~30-35 μm) from each mouse for quantification. In total, there were 70 sections (from 7 mice, 4 control and 3 susceptible mice with 1 CSDS brain sample damaged and discarded). The number of c-Fos positive neurons in each slice were counted in ImageJ and clustered in R program (R version 3.5.2). In 10-day CSDS paradigm, 4 brain sections from each mouse of control, susceptible and resilient groups (4 mice per group) were immunostained and quantified. To compare the c-Fos expression in Ent Va of susceptible and resilient mice from 10-day and 21-day CSDS paradigms, z-score for each mouse was applied as previous studies[8, 9].

We used Igor pro 6.03 and MATLAB 2018a for the analysis of Ca2+ signals. All raw data were smoothed in box (200 points), segmented and aligned according to the onset of behavioral events. The fluorescence change was calculated as ΔF/F = (F-F0)/F0, where F0 was the baseline fluorescence signal taken during the whole recording period. The duration of different events in EPM (open arms, center, closed arms) was normalized by the mean duration (Fig. 7d). The ΔF/F in different mobile periods in FST or restraint test was normalized to the mean fluorescence change and then aligned to the onset of movement (Fig. 7n, o). The rate of Ca2+ activity change during each event in EPM was calculated by the mean slope of the fitted signals.

The Ca2+ dynamics during continuous reward was fitted by a savitzky-golay filter (Fig. 7h). The change of ΔF/F during and after licking reward was calculated based on the fitted dynamics. The amplitude, rate and duration of change were quantified and compared between behavioral events.

To quantify the change of neural activity during chemogenetic inactivation using hM4Di, Ca2+ activity of the Ent neurons and the Ent→V2M circuit under anesthesia or (and) awake were recorded using fiber photometry. The peaks of Ca2+ transients during the entire recording period and the average peak amplitude under different conditions were compared (Fig. 4d; Supplementary Fig. 9f; Supplementary Fig.10f).

**Reference**

1. Guo ZV, Hires SA, Li N, O’Connor DH, Komiyama T, Ophir E, et al. Procedures for behavioral experiments in head-fixed mice. PLoS ONE. 2014;9.

2. Zhong W, Li Y, Feng Q, Luo M. Learning and stress shape the reward response patterns of serotonin neurons. Journal of Neuroscience. 2017;37:8863–8875.

3. Guo ZV, Inagaki HK, Daie K, Druckmann S, Gerfen CR, Svoboda K. Maintenance of persistent activity in a frontal thalamocortical loop. Nature. 2017;545:181–186.

4. Guo ZV, Li N, Huber D, Ophir E, Gutnisky D, Ting JT, et al. Flow of cortical activity underlying a tactile decision in mice. Neuron. 2014;81:179–194.

5. Huo Y, Chen H, Guo Z v. Mapping Functional Connectivity from the Dorsal Cortex to the Thalamus. Neuron. 2020:1–15.

6. Jun J, Mitelut C, Lai C, Gratiy S, Anastassiou C, Harris T. Real-time spike sorting platform for high-density extracellular probes with ground-truth validation and drift correction. BioRxiv. 2017:101030.

7. Shamash P, Carandini M, Harris K, Steinmetz N. A tool for analyzing electrode tracks from slice histology. BioRxiv. 2018. 2018. https://doi.org/10.1101/447995.

8. Guilloux JP, Seney M, Edgar N, Sibille E. Integrated behavioral z-scoring increases the sensitivity and reliability of behavioral phenotyping in mice: Relevance to emotionality and sex. Journal of Neuroscience Methods. 2011;197:21–31.

9. Lu J, Gong X, Yao X, Guang Y, Yang H, Ji R, et al. Prolonged chronic social defeat stress promotes less resilience and higher uniformity in depression-like behaviors in adult male mice. Biochemical and Biophysical Research Communications. 2021;553:107–113.

**Supplementary figures and legends**


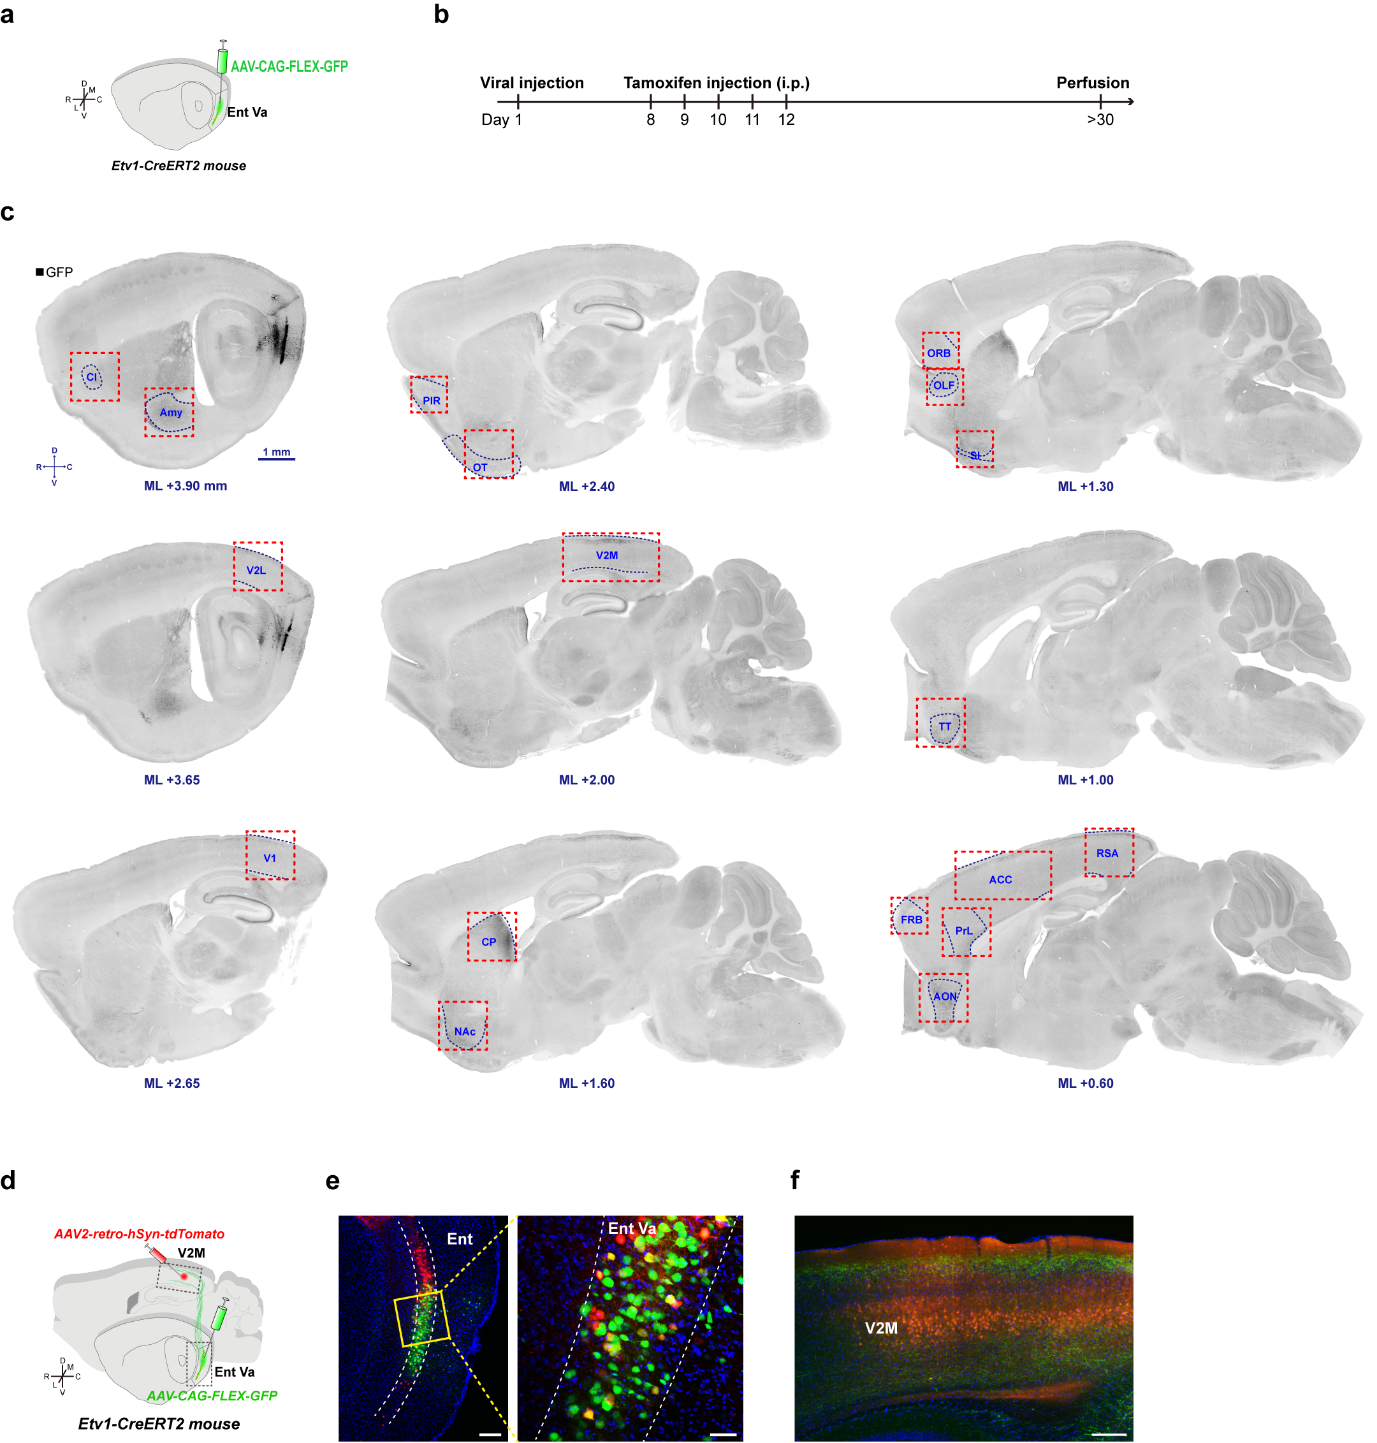


**Supplementary Fig. 1 Major brain areas that receive projections from Ent Va neurons. a** Schematic of virus injection in Etv1-CreERT2 mice. **b** Experimental timeline. After viral injection, mice were allowed to recover for one week. Then tamoxifen was injected for 5 consecutive days. One month after vial injection, mice were perfused for brain imaging. **c** Series sagittal sections showing brain areas with major projections from Ent Va. **d** Schematic of anterograde virus injection in Ent and retrograde virus injection in V2M. **e** Etv1+ neurons (with GFP, green) and V2M-projecting Ent neurons (with tdTomato, red) were located in layer Va of Ent. **f** Axonal projections (green) from Ent Va near the injection site in V2M (tdTomato, red). Scale bars, 1.0 mm in **c**, 200 μm in **e** (left image) and **f**; 50 μm in **e** (right image).


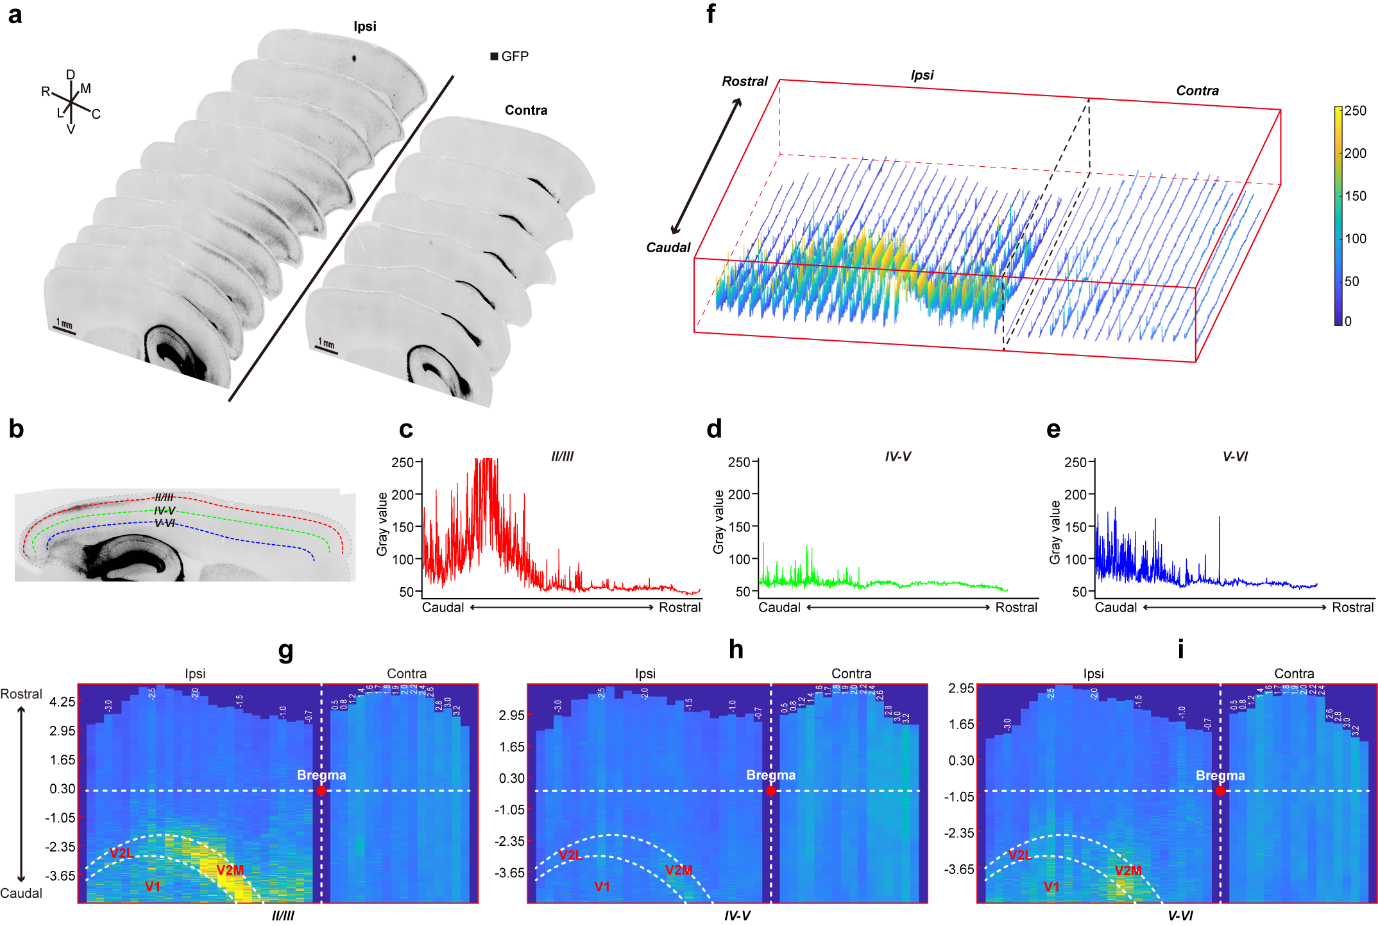


**Supplementary Fig. 2 Distribution of Ent Va neural projections in different layers of neocortex. a** Projections in a series of sagittal brain sections. Ipsi, ipsilateral; Contra, Contralateral; R, rostral; C, caudal; D, dorsal; V, ventral; L, lateral; M, medial. Scale bar, 1 mm. Black, GFP. **b** Quantification of the projection density in three depths (layers of II/III, IV-V, V-VI) of neocortex. Intensity (gray value) of different layers along the caudal-rostral axis are shown in **c, d, e**. **f** Intensity in layers II/III is shown in 3D. Each line represents intensity from a sagittal section. **g, h, i** 2D intensity map of the Ent Va projections in different depths (**g**, II/III; **h**, IV-V; **i**, V-VI). V1, primary visual cortex; V2M, the medial part of the secondary visual cortex; V2L, the lateral part of the secondary visual cortex.


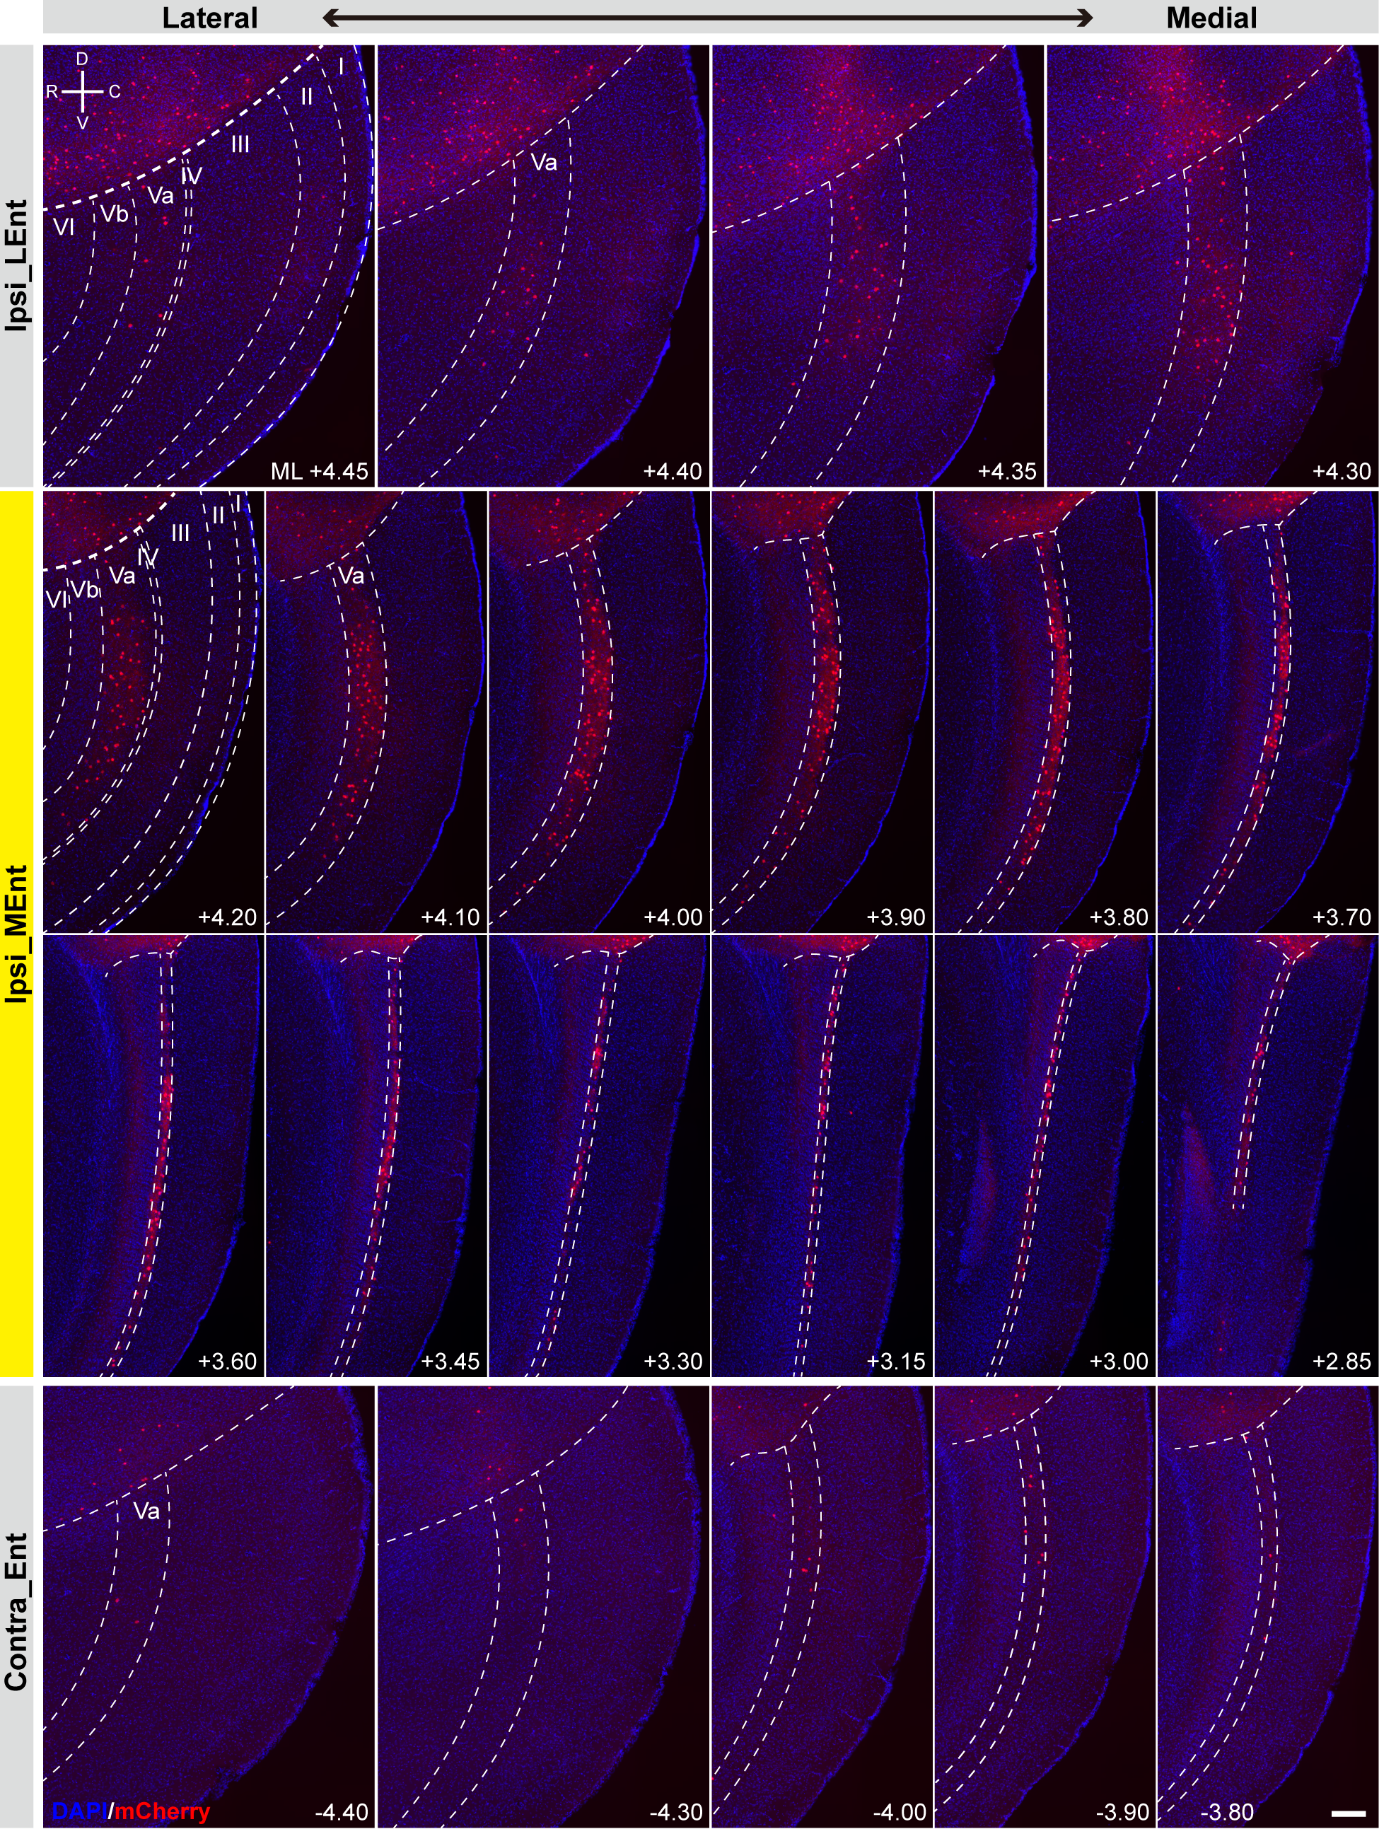


**Supplementary Fig. 3 Distribution of V2M**-**projecting neurons in Ent.** A series of brain sections from entorhinal cortex reveal the distribution of retrograde-labeled Ent neurons along the lateral-medial axis. V2M projecting Ent neurons are almost all confined in layer Va in the ipsilateral hemisphere. Ipsi, ipsilateral; Contra, Contralateral; LEnt, lateral part of entorhinal cortex; MEnt, medial part of entorhinal cortex; ML, mediolateral. The unit of the numbers is mm. +, right side; -, left side of brain. R, rostral; C, caudal; D, dorsal; V, ventral. Scale bar, 200 μm.


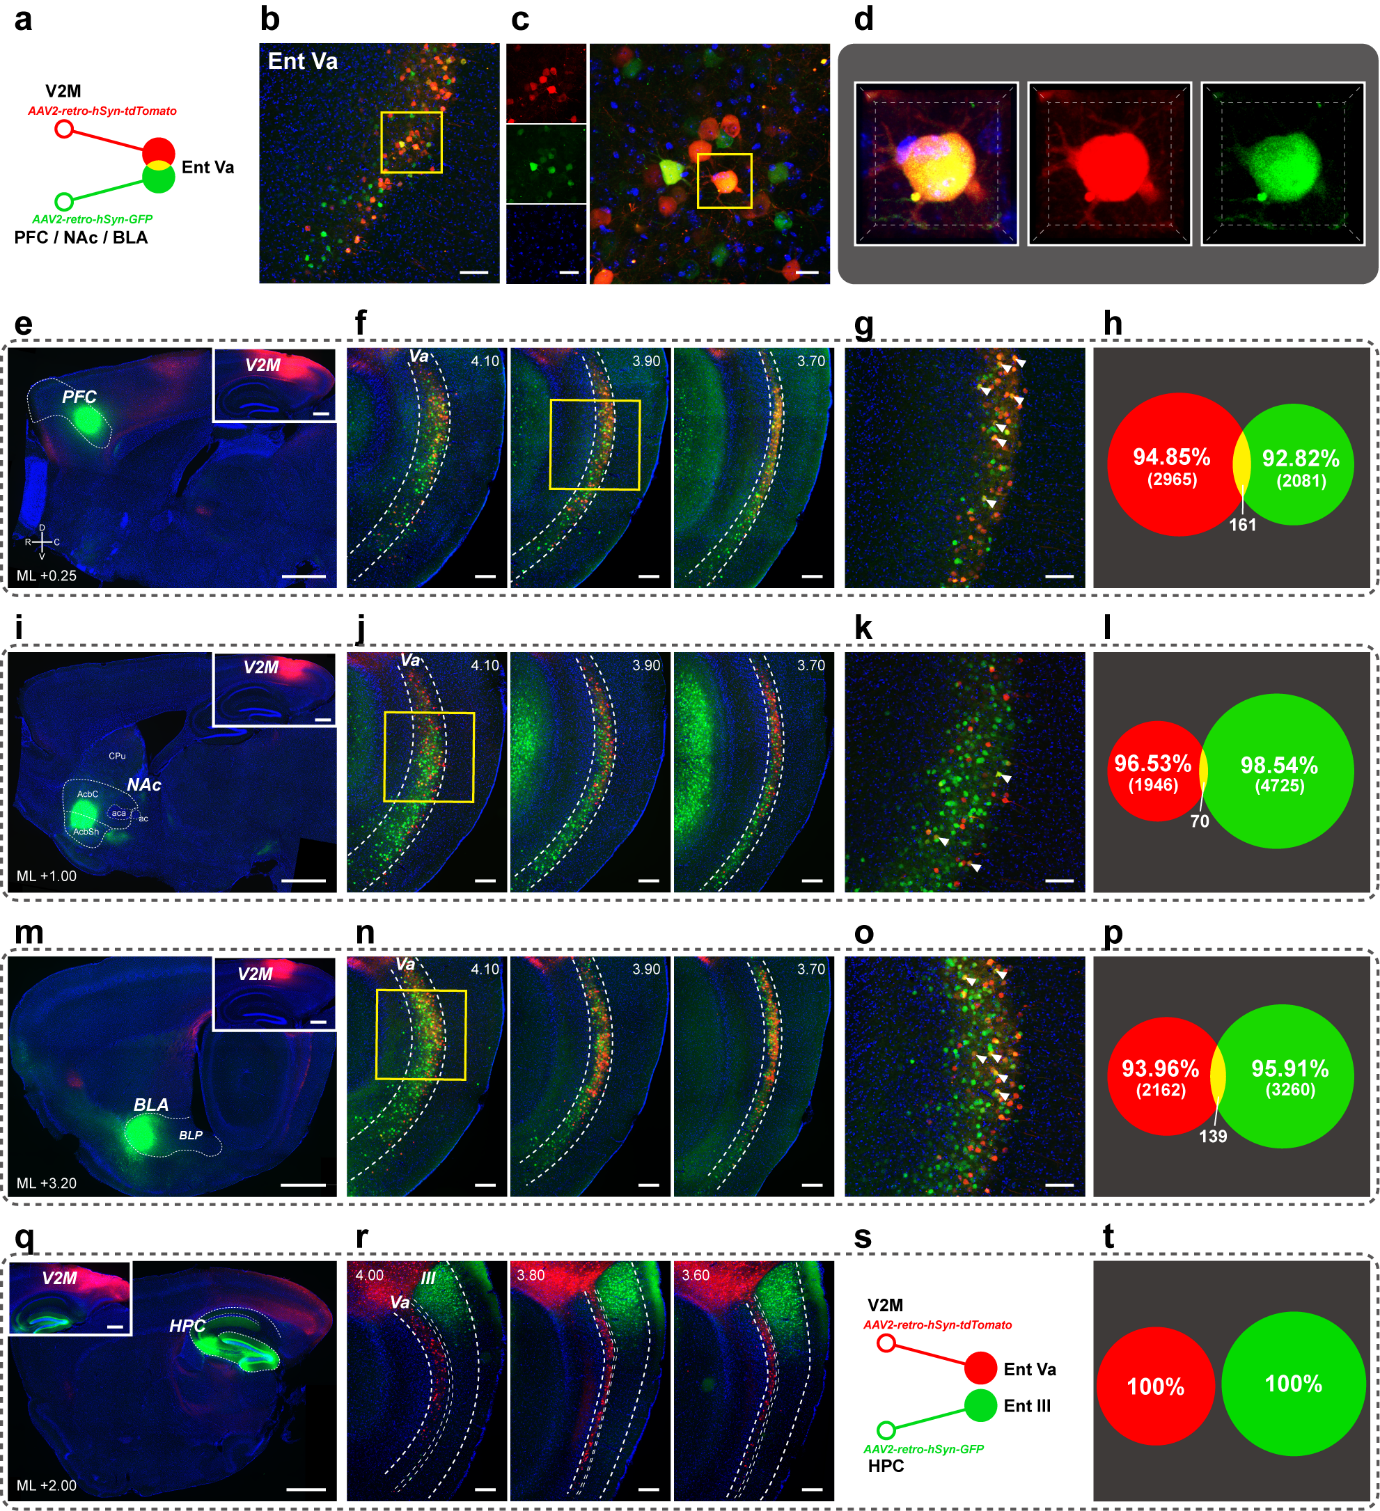


**Supplementary Fig. 4 Ent→V2M projection neurons represent a distinct population in Ent Va. a** Schematic of co-labeling of Ent Va neurons projecting to V2M and other brain areas (PFC, NAc or BLA) by using dual viral injection of retrograde AAV with different fluorescent markers (tdTomato and GFP). **b** Example image of retrograde labeled neurons in Ent Va. **c** Magnified image within the boxed region in **b.** The image was split into different channels in the left three panels. Scale bar, 50 μm (Left) and 20 μm (Right). **d** Magnified image within the boxed region in **c** to show an example co-labeled neuron. **e** Retrograde virus was injected in PFC (GFP) and V2M (tdTomato). Scale bar, 1 mm. Scale bar in inset, 500 μm. **f** Retrograde labeled neurons in Ent Va. Scale bar, 200 μm. **g** Magnified image of the boxed region in **f**. Scale bar, 100 μm. **h** Fraction of co-labeled Ent Va neurons is low. **i, j, k, l** same format as in **e**, **f**, **g**, **h**, but for injections in NAc and V2M. **m, n, o, p** same format as in **e**, **f**, **g**, **h**, but for injections in the basolateral amygdala (BLA) and V2M. **q, r, s, t** same format as in **e**, **f**, **a**, **h**, but for injections in HPC and V2M. Retrograde labeled neurons were distributed in Ent III (from HPC) and Va (from V2M).


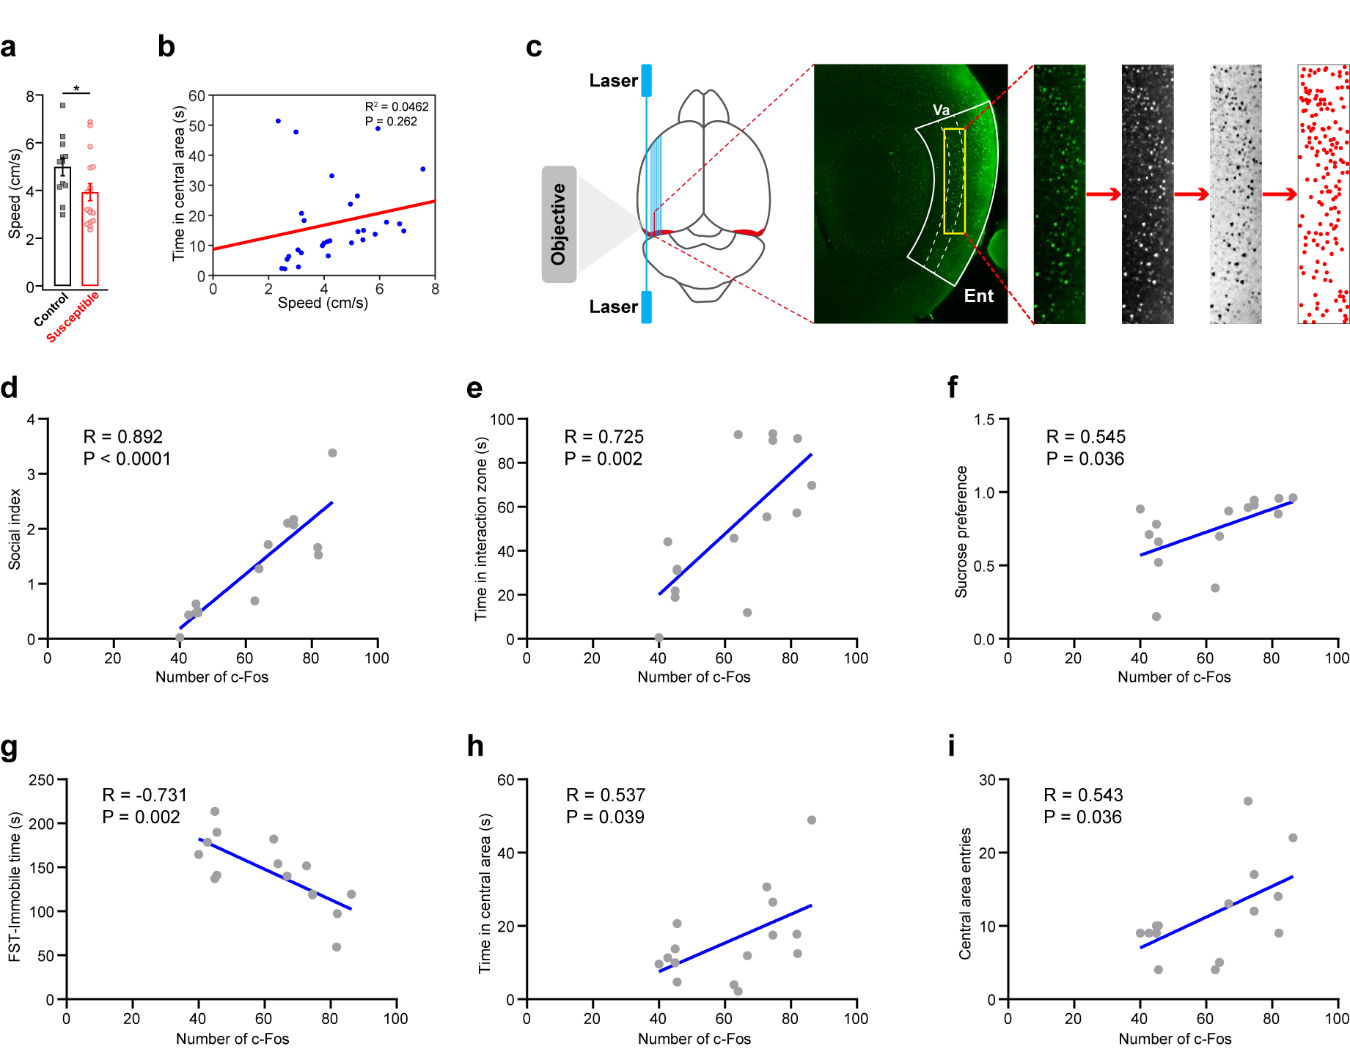


**Supplementary Fig. 5 Locomotion speed, c-Fos imaging, quantification and the correlation with depression-like behaviors. a** Mean speed of susceptible mice (red) is lower than control mice (black) in OFT. **b** There is no significant correlation between the time in central area and movement speed during OFT. Pearson correlation coefficient, *P* = 0.262, R2 = 0.0462, n = 12 control mice and 17 susceptible mice. **c** Procedure of light-sheet imaging and quantification of c-Fos positive neurons in Ent Va. **d, e** Social index and time in interaction zone showed significant correlation with the number of c-Fos positive neurons. **f**, **g** Sucrose preference and immobile time in FST also showed significant correlation with the number of c-Fos positive neurons. **h**, **i** Both time in central area and entries to central area in the OFT test showed significant correlation with the number of c-Fos positive neurons. Resilient mice were excluded as they showed no change in multiple behavioral tests. Pearson correlation, n = 15 mice. Statistics, t-tes, **P* < 0.05. Data are shown as mean ± s.e.m.


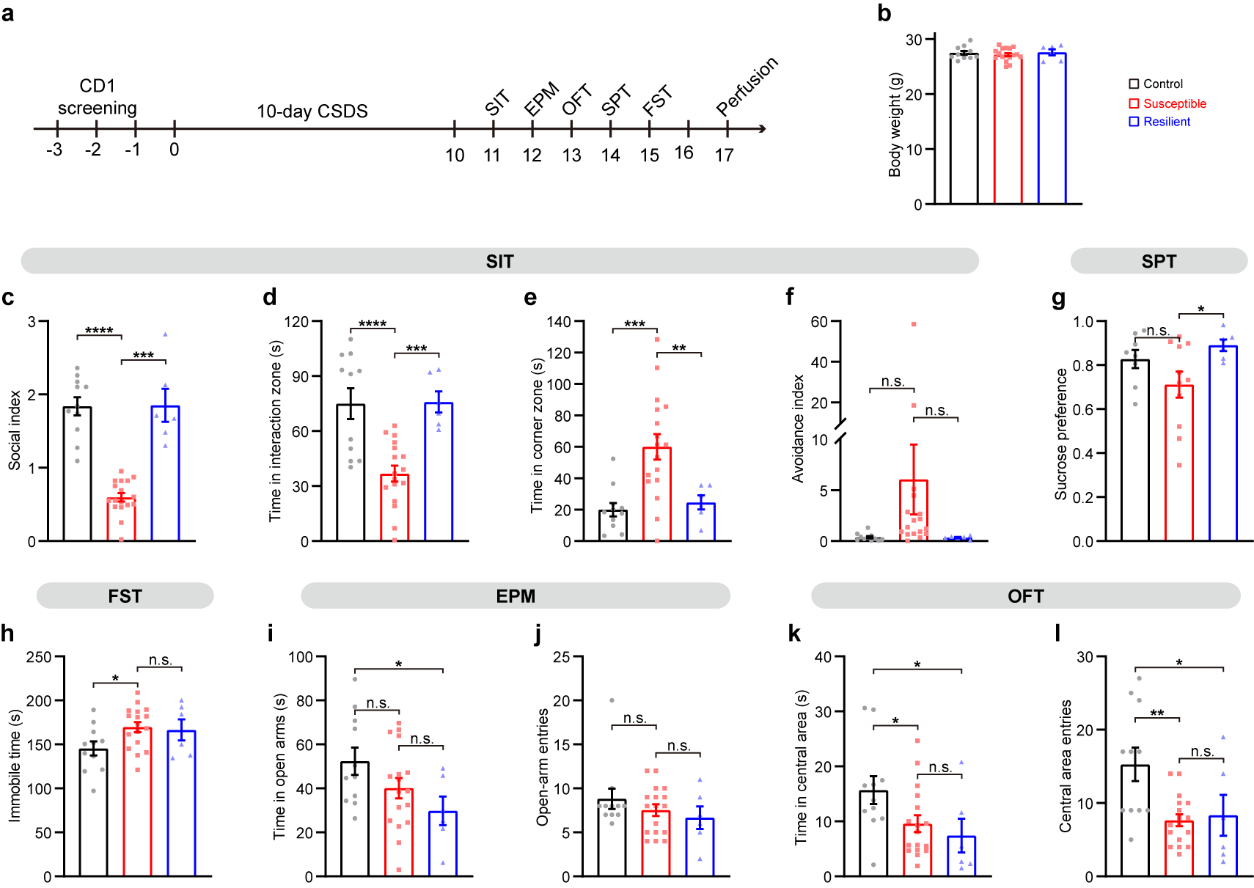


**Supplementary Fig. 6 Depression-like behaviors in 10-day CSDS paradigm. a** Experimental timeline of 10-day CSDS and behavioral test. **b** Susceptible and resilient mice showed no difference in bodyweight from control mice. **c, d, e, f** Social index, times in the interaction and corner zone, and avoidance index were quantified in the three groups of mice. **g** The sucrose preference of susceptible mice but not resilient mice was decreased. **h** Both susceptible and resilient mice had longer immobile time than control mice. **i, j** Time in open arms and open-arm entries in EPM test for susceptible and resilient mice. **k, l** Susceptible and resilient mice showed significant less time (**k**) and entries (**l**) in OFT test compared with control mice. Statistics, one-way ANOVA followed by LSD post hoc test. *****P* < 0.0001, ****P* < 0.001, ***P* < 0.01, **P* < 0.05. n.s., not significant. n = 11 mice in the control group, 17 mice in susceptible group, 6 mice in resilient group. Data are shown as mean ± s.e.m.


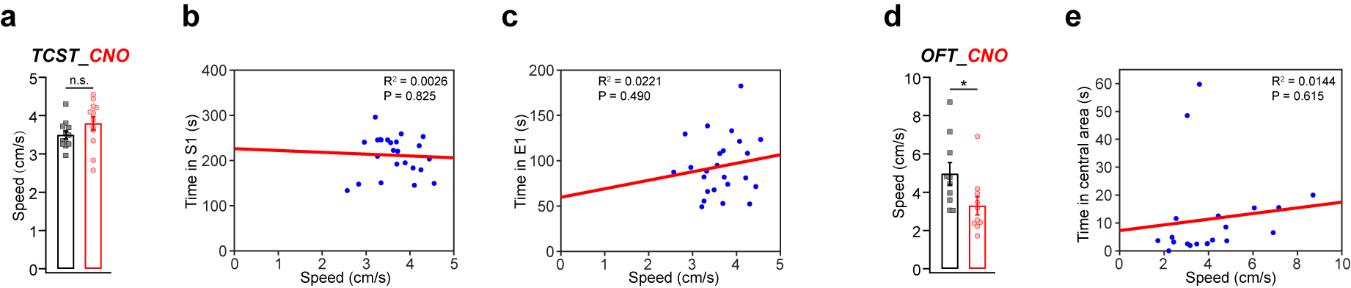


**Supplementary Fig. 7 Locomotion speed shows no correlation with depression-like behaviors under chemogenetic inactivation. a** There is no significant difference in speed between hM4Di (red) and mCherry (black) mice in the three-chamber social test, n = 12 mice for each group. **b, c** Correlation between locomotion speed and duration in interaction with a stranger mouse in S1 (**b**) or with an empty perforated cylinder in E1 (**c**). n = 12 mice for each group. **d, e** The speed of hM4Di mice is lower than that of mCherry mice during OFT, n = 10 mice for each group. There is also no significant correlation between duration in central area and locomotion speed. Statistics, t-test, **P* < 0.05, n.s., not significant. Data are shown as mean ± s.e.m.


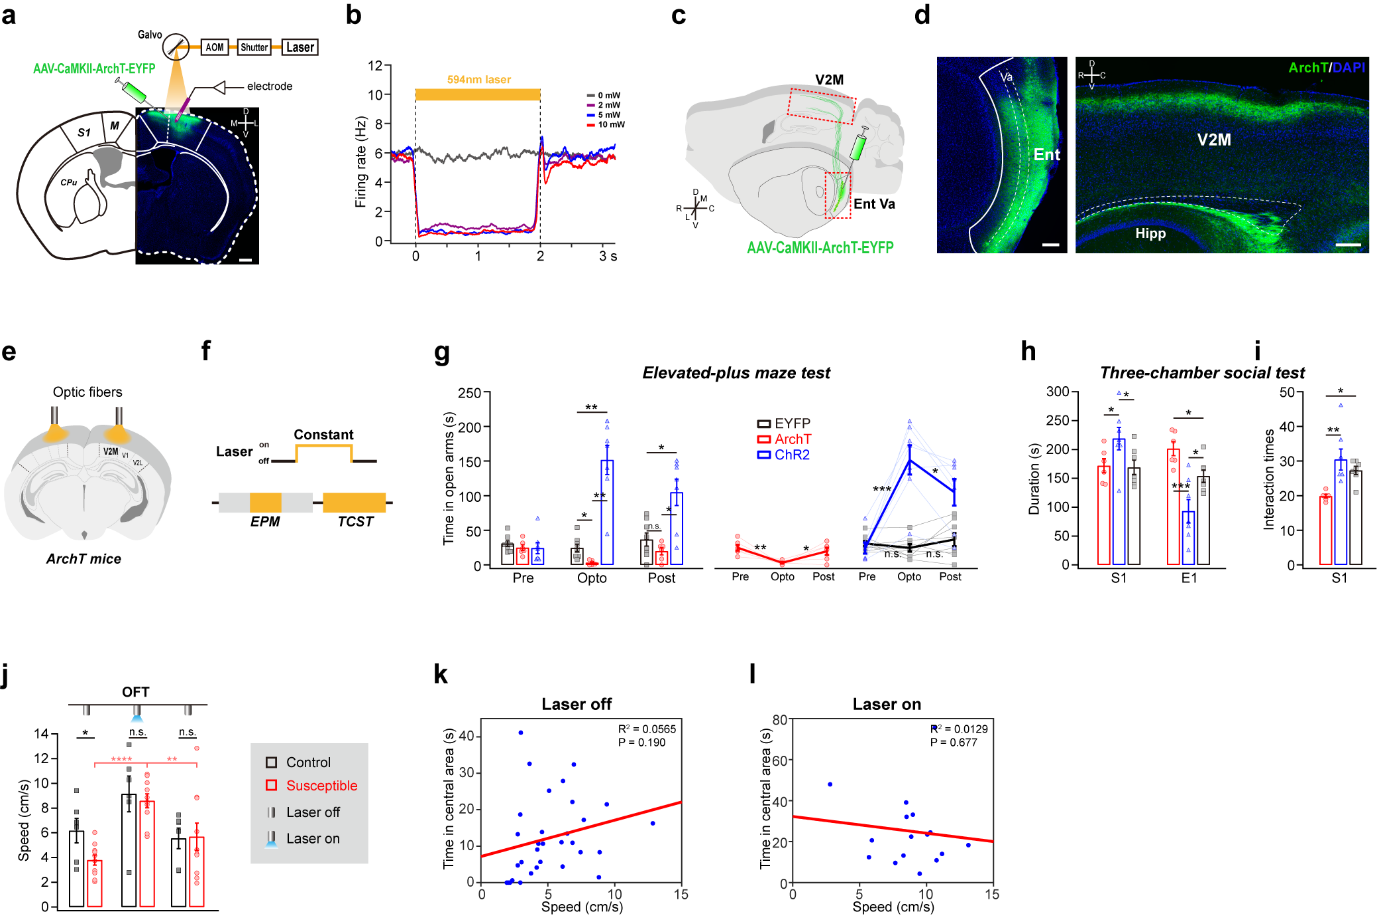


**Supplementary Fig. 8 Optogenetic inactivation and activation of Ent→V2M projection terminals bidirectionally modulate depression-like behaviors. a** Schematic of functional test of optogenetic inactivation. Light sensitive silencer ArchT was expressed in the primary somatosensory cortex and a multichannel silicon probe was used to record neural activity during laser illumination. **b** Peristimulus time histogram of somatosensory neurons during control (black) and optogenetic inactivation (laser powers 2, 5, 10mW) conditions. **c** Schematic of viral injection to express ArchT in Ent→V2M projection neurons. **d** Expression of ArchT in Ent Va neurons (left) and axonal projections in V2M (right). **e** Schematic of optogenetic inactivation of the Ent→V2M projection terminals in V2M. **f** Laser was delivered constantly during EPM and TCST tests. **g** Optogenetic activation or inactivation of the Ent→V2M projection terminals bi-directionally modulate the anxiety state in EPM. Optogenetic inactivation (red) decreases the duration of exploring in open arms while activation (blue) promotes mice to explore more in open arms. **h, i** Optogenetic perturbations in three-chamber social test. Activation of the Ent→V2M projection terminals significantly increases the interaction duration and times with a stranger mouse at S1 while reduces the interaction duration at an empty perforated cylinder at E1. Optogenetic inactivation produced behavioral effects opposite to that during activation. n = 6 ArchT mice, 7 ChR2 mice and 7~8 GFP mice. **j** Optogenetic activation increases speed of susceptible mice (red) to the level in control mice (black). n = 6 control mice and 10 susceptible mice. **k, l** There is no significant correlation between time in central area and speed under different conditions (no laser (**k,** n = 32 mice), laser on (**l,** n = 16 mice)). Statistics, two-way ANOVA followed by Tukey post hoc test and one-way ANOVA followed by Sidak test. *****P* < 0.0001, ****P* < 0.001, ***P* < 0.01, **P* < 0.05, n.s., not significant. Data are shown as mean ± s.e.m. Scale bars, 500 μm (in **a**); 200 μm (in **d**).


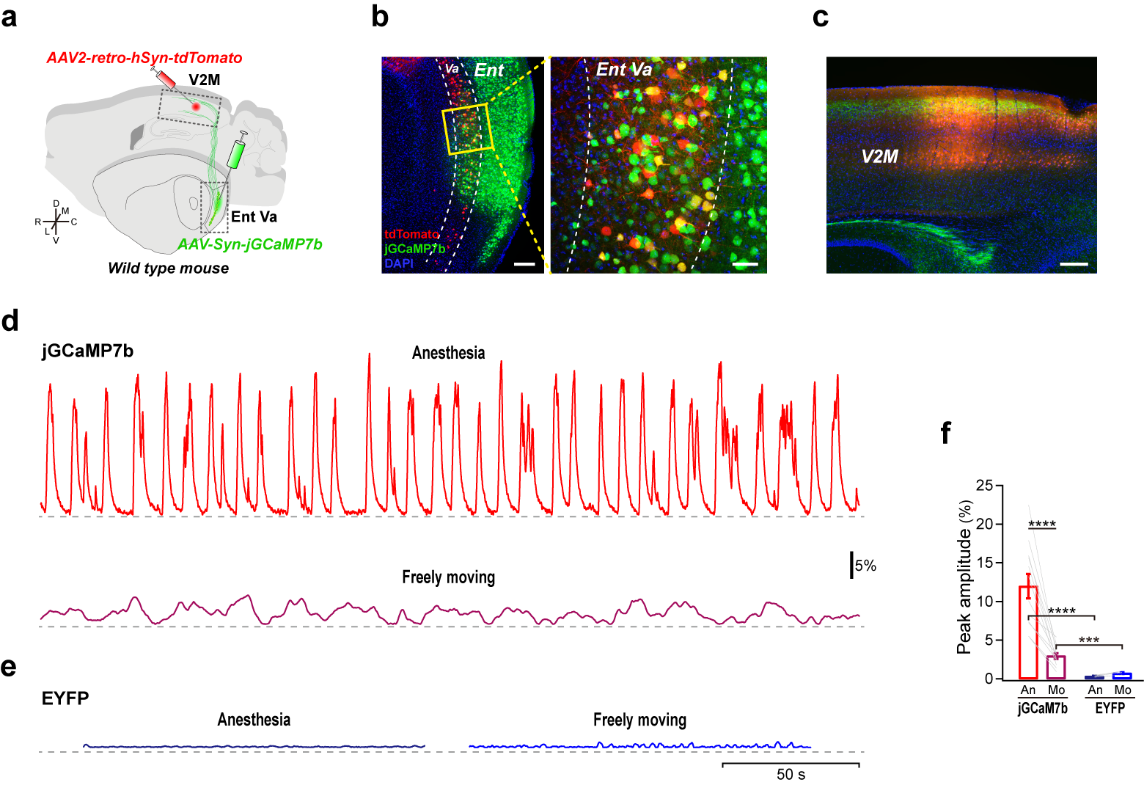


**Supplementary Fig. 9 Activity of the Ent→V2M projection terminals recorded using fiber photometry. a** Schematic of viral injection in Ent Va (jGCaMP7b) and V2M (retro-tdTomato). **b** Ent Va neurons retrogradely labelled with tdTomato are located in layer Va of Ent. **c** tdTomato was expressed in V2M neurons and jGCaMP7b was expressed in axonal projections of Ent Va neurons. **d** Example fluorescence traces under anesthesia and freely moving conditions. **e** Example fluorescence traces under anesthesia and freely moving conditions for control mice expressing Ca2+ insensitive EYFP. **f** Mean peak amplitude of fluorescence change under anesthesia and freely moving conditions in jGCaMP7b and EYFP mice. n = 12 mice. Statistics, t-test (between-group) and paired t-test (intragroup). ****P* < 0.001, *****P* < 0.0001. Data are shown as mean ± s.e.m. Scale bars, 200 μm (in **b** (left image)and **c**); 50 μm (in **b** (right image)).


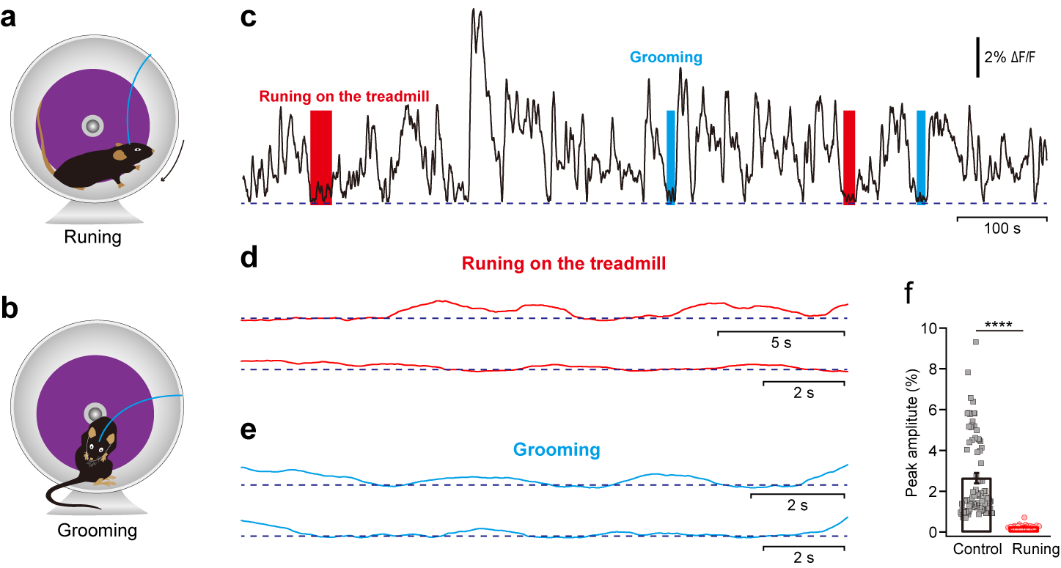


**Supplementary Fig. 10 The Ent→V2M projection does not respond to running and grooming. a, b** Mice ran on a treadmill (**a**) or groomed their body or face (**b**). **c** Example fluorescence trace during freely exploration, continuously running (red) and grooming (blue). **d, e** Zoom in view of fluorescence traces during running (**d**) or grooming (**e**) from (**c**). **f** Mean peak amplitude of fluorescence change during freely exploration and running. There is large fluorescence change during freely exploration. n = 90 trials for freely exploration and 27 trials for running from 5 mice. Statistics, t-test, *****P* < 0.0001. Data are shown as mean ± s.e.m.


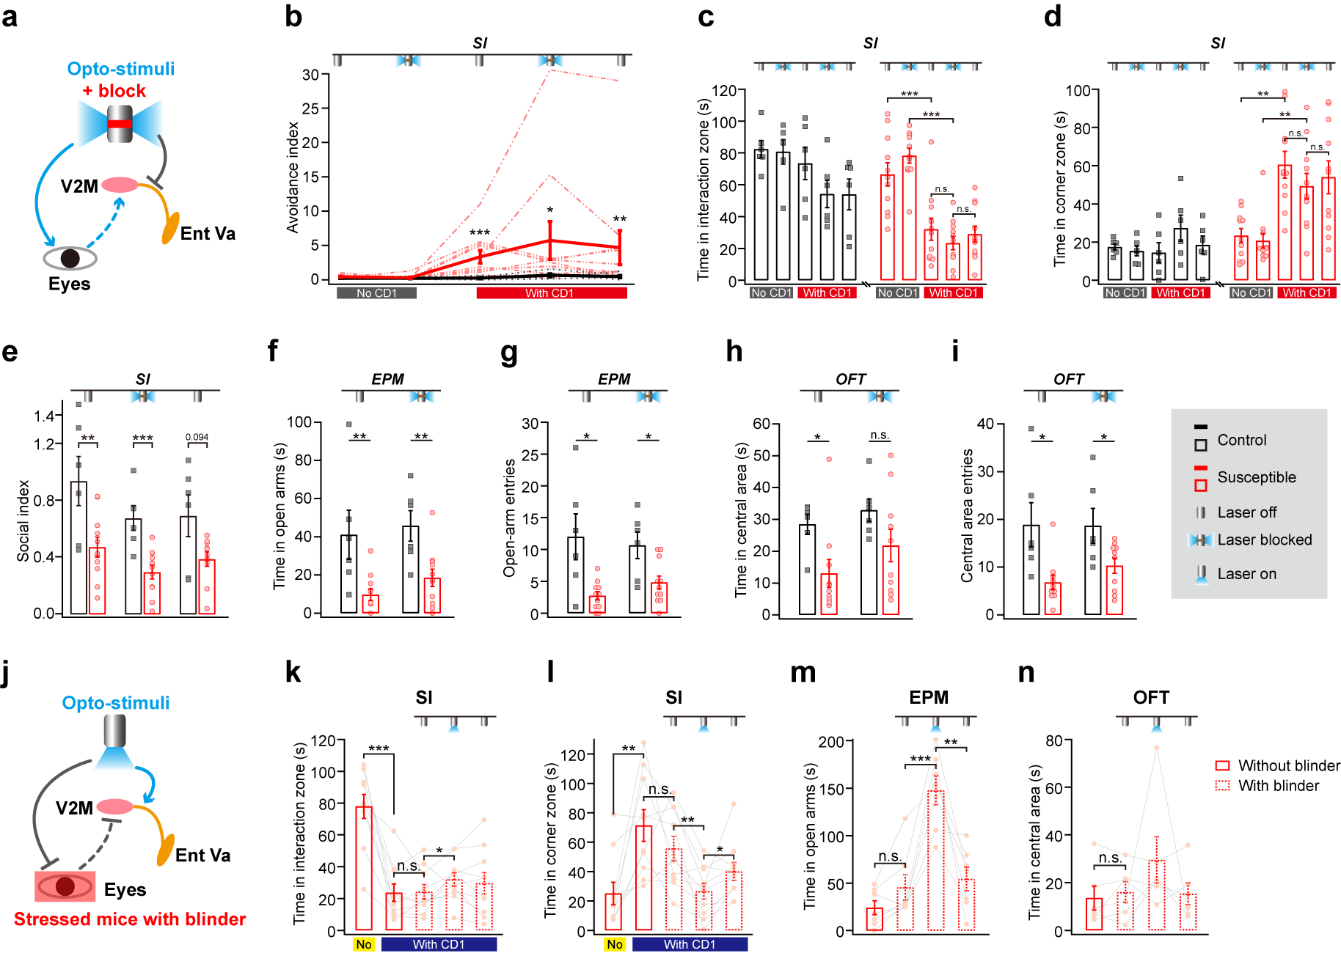


**Supplementary Fig. 11 Visual perturbation does not alleviate depression-like phenotypes and the antidepressant-like effect induced by optogenetic activation of the Ent→V2M projection terminals is independent of visual input. a** Schematic of blocking optogenetic activation of the Ent→V2M projection terminals. Leaked light that may provide visual input is not affected. **b, c, d, e** Differences in social interaction (quantified as avoidance index (**b**), time in interaction zone (**c**), time in corner zone (**d**) and social index (**e**)) between susceptible and control mice were maintained with laser light blocked in optical path (but with leaked light unaffected). n = 6 control and 11 susceptible mice. **e, f, g, h** Animals still explored much less in open arms of EPM (**f,** **g**) and in central area of OFT (**h, i**) as quantified by exploration duration (**f, h**) and entries (**g, i**) with laser blocked. n = 6 control mice and 11 susceptible mice in EPM; n = 6 control mice and 10 susceptible mice in OFT. **j** Schematic of blocking visual input from the environment using a blinder to cover eyes of mice. **k, l** In social interaction test, susceptible mice with blinder showed no difference in time spent in the interaction zone (**k**) or in the corner zone (**l**) compared with not wearing the blinder. Optogenetic activation still promotes interaction under the with blinder condition. **m, n** Blocking of vision has no effect on exploration in EPM and OFT as indicated by similar time spent in open arms (**m**) or in central area (**n**). Optogenetic activation still promotes animal to explore more in open arms or in central area during behavioral tests. Statistics: t-test or Mann-Whitney U test for between group-comparison and one-way ANOVA followed by Sidak post hoc test or LSD post hoc test for intragroup comparison. **P* < 0.05, ***P* < 0.01, ****P* < 0.001, n.s., not significant. Data are shown as mean ± s.e.m.


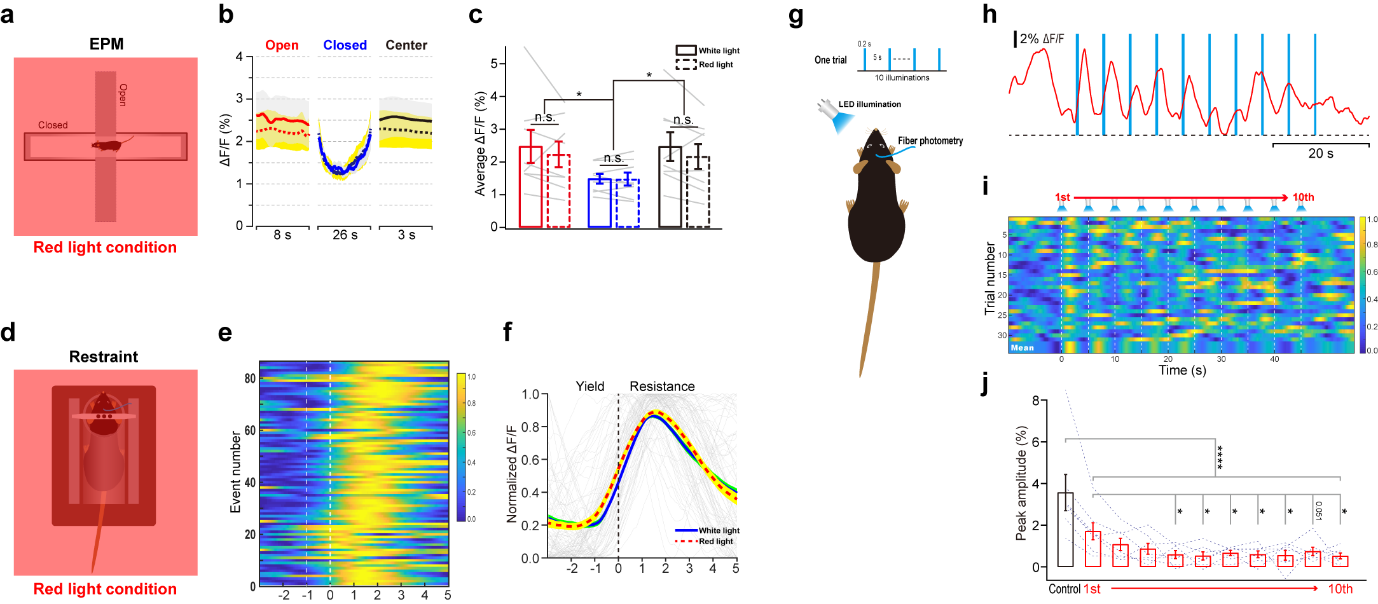


**Supplementary Fig. 12 External visual perturbation does not affect the activity pattern of Ent→V2M projection terminals. a** Schematic of a mouse in EPM under red light condition. **b** Fluorescence change when mice explored in open arms, closed arms and center of EPM under red light (dashed line) and white light (solid line) conditions. Shading, s.e.m. **c** Mean amplitude of fluorescence change when animal explored in open arms, center and closed arms of EPM under red and white light conditions. n = 8 mice. **d** Schematic of a mouse in restraint test under red light condition. **e, f** Heatmap (**e**) and normalized fluorescence change (to the amplitude of each event, **f**) during restraint test under red light condition. Shading, s.e.m. Gray lines, individual event under red light condition (n = 86 from 5 mice). **g** Schematic of viusal stimuli. Each stimulus has 200 ms LED on period and followed with a 5 s of inter-stimulus internval. There are 10 consecutive stimuli in a trial, and 4-5 trials for each mouse. **h** Example fluorescence trace in a typical trial. **i** Heatmap of normalized fluorescence change (to the largest amplitude during presentation of visual stimuli) for all trials (n = 31 from 7 mice). **j** Mean amplitude of fluorescence change for 10 LED visual stimuli (1st to 10th). Consecutive flashes, except the first two, do not activate the Ent→V2M pathway. The initial response is likely due to the startle effect rather than adaption of response as the stimulus interval of 5 s allowed fluorescence to relax back to baseline before the next stimulus. n = 7 mice. Statistics, one-way ANOVA followed by LSD post hoc test and paired t-test. *****P* < 0.0001, **P* < 0.05, n.s., no significant difference. Data are shown as mean ± s.e.m.
